# Supplementary material
Source: PubMed Central journal article supplement (PMC3769930)
Supplement: mmc1.pdf [file mmc1.pdf]

## Supplemental Data

### Mutations in *DDX59* Implicate RNA Helicase in the Pathogenesis of Orofaciodigital Syndrome

Hanan E. Shamseldin, Anna Rajab, Amal Alhashem, Ranad Shaheen, Tarfa Al-Shidi,  
Rana Alamro, Salma Al Harassi, and Fowzan S. Alkuraya

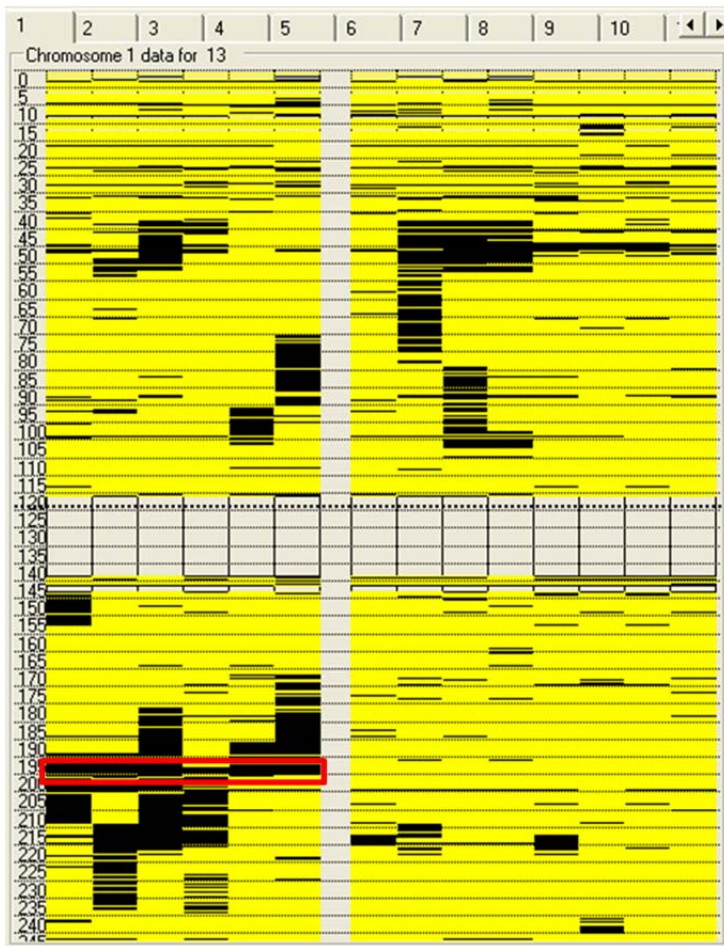

Figure S1. Autozygosity mapping of two families with autosomal recessive OFD. autoSNPa output on the available affected individuals (left) and unaffected relatives (right). Note the exclusive sharing of one black area indicative of homozygosity among affected individuals (boxed in red).



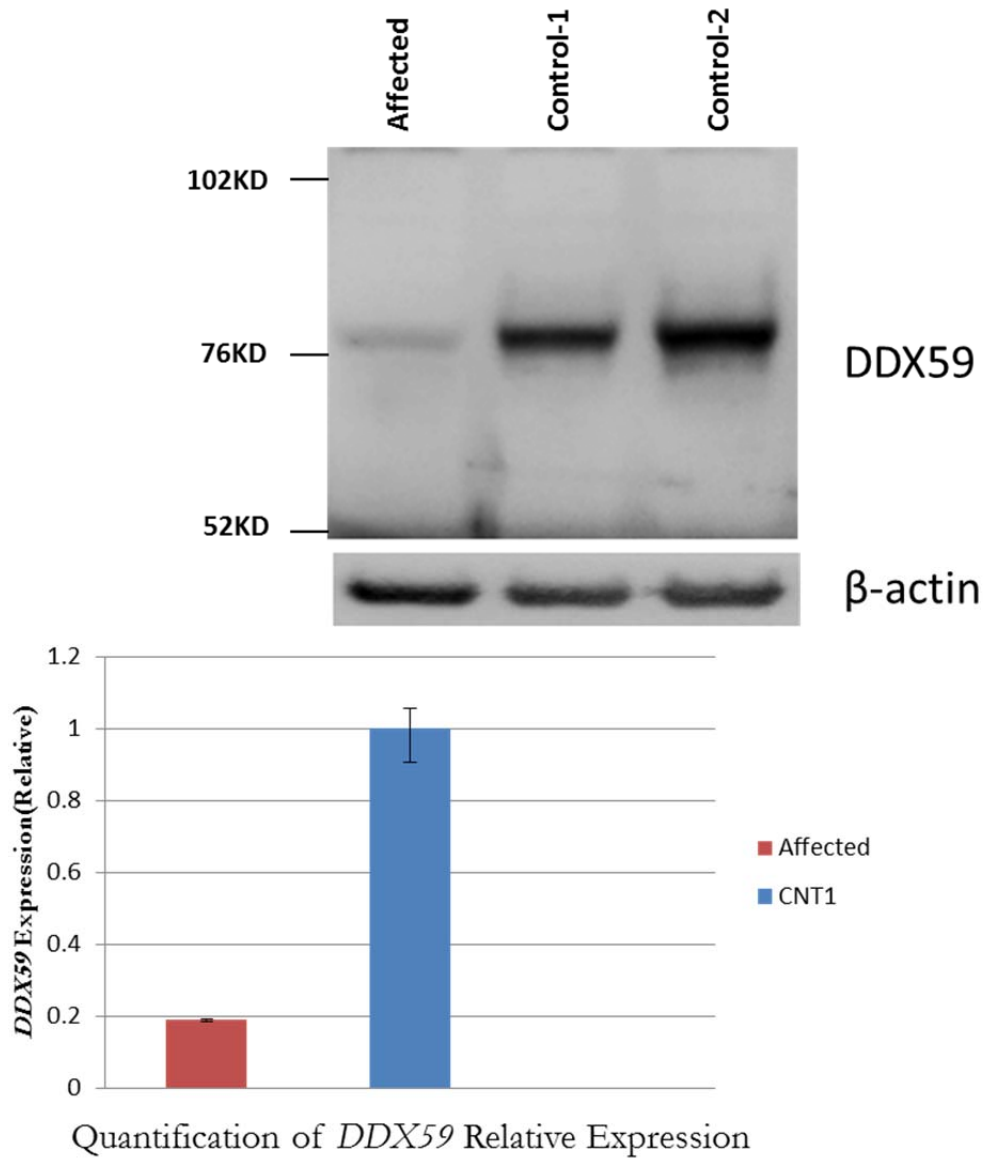

Figure S3. Immunoblot analysis using DDX59 antibody on fibroblasts from two controls and from one affected individual showing marked reduction as quantified in the lower panel.
